# Supplementary material for: TLR9 re-expression in cancer cells extends the S-phase and stabilizes p16INK4a protein expression
Source: PubMed Central journal article supplement (PMC4972902; doi:10.1038/oncsis.2016.49), 2016-07-25
Supplement: oncsis201649x1.pdf [file oncsis201649x1.pdf]

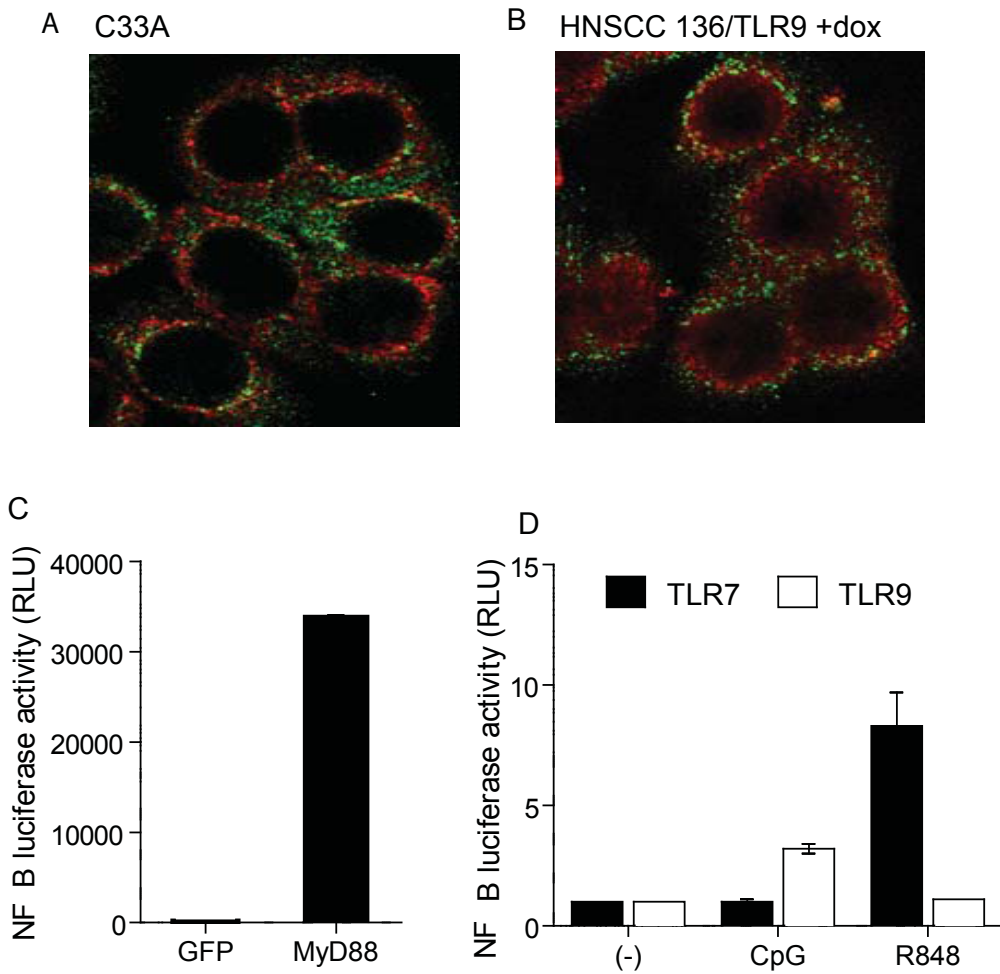

Figure 1: (A) TLR9 expression was analyzed in C33A cells by confocal microscopy. TLR9 (green) and calreculin (red) staining. (B) TLR9 expression was analyzed in HNSCC-136 –TLR9 cells by confocal microscopy. TLR9 (green) and calreculin (red) staining. (C) HEK293 cells were co-transfected with pbabe expressing (C) MyD88, (D) TLR9 or TLR7 with the NF-κB luciferase reporter construct and the TK-Renilla reporter. Eighteen hours post transfection cells were stimulated with 3uM of CpG-B or by R848. Cells were harvested and luciferase activity measured and normalized by the Renilla.
